# Supplementary material
Source: ML conference proceedings conference paper supplement (https://aclanthology.org/K19-1093)
Supplement: Attachment [file K19-1093.Attachment.zip]

## A Experimental Settings

|         |                      |                     |
|---------|----------------------|---------------------|
| Dataset | Starting Time        | 2009.04.06-22:19:57 |
|         | Ending Time          | 2009.06.25-10:28:28 |
|         | # Training Samples   | 82,361              |
|         | Timestamp 1          | 2009.06.03-00:00:00 |
|         | # Validation Samples | 16,437              |
|         | Timestamp 2          | 2009.06.07-00:00:00 |
|         | # Test Samples       | 23,202              |

|                 |                             |                 |
|-----------------|-----------------------------|-----------------|
| Recurrent Block | Recurrent Dropout           | 0.4             |
| Attention Block | Fully-connected Layer       | 100 nodes       |
|                 | Activation Function         | tanh            |
|                 | Output Layer                | 2 (Pos. & Neg.) |
|                 | Activation Function         | softmax         |
| Optimizer       | Adam (learning rate: 0.001) |                 |
| Loss            | Categorical Crossentropy    |                 |

Table 2: Additional details of the technical setup.
